# Supplementary material for: High-performance reduced graphene oxide supercapacitors enabled by simple amino hydroquinone dimethylether
Source: Royal Society of Chemistry journal article supplement (doi:10.1039/d3cc01597a), 2023-01-01
Supplement: d3cc01597a1.pdf [file d3cc01597a1.pdf]

## Supplementary Information

### **High-performance reduced graphene oxide supercapacitors enabled by simple amino hydroquinone dimethylether**

Yang Luo <sup>a</sup>, Haihui Lin<sup>a</sup>, Yuxiao Chu <sup>a</sup>, Jian Wang <sup>a</sup>, Naxing Liu <sup>a</sup>, Fu-Gang Zhao<sup>\*a</sup>,  
Lei Dong<sup>\*b</sup>, Yuegang Chen<sup>\*a</sup> and Yongmiao Shen<sup>\*a</sup>

<sup>a</sup>Department of Chemistry, Key Laboratory of Surface & Interface Science of Polymer Materials of Zhejiang Province, Zhejiang Sci-Tech University, 928 Second Street, Hangzhou 310018, China

<sup>b</sup>State Key Laboratory of Solidification Processing, Center of Advanced Lubrication and Seal Materials, School of Materials Science and Engineering, Northwestern Polytechnical University, Xi'an 710072, China

E-mail: donglei@nwpu.edu.cn (L. Dong), fgzhao@zstu.edu.cn (F.-G. Zhao), chenyg@zstu.edu.cn (Y. Chen), shenym@zstu.edu.cn (Y. Shen)

# Experimental section

## 1. Materials

Amino hydroquinone dimethylether (AHQDME) and Graphene oxide (GO) were purchased from Aladdin company. All other chemicals were used as received, without any further purification.

## 2. Characterization

Elemental analysis on carbon (C), hydrogen (H) and nitrogen (N) contents was carried out with an Elementar vario EL III elemental analyzer. Fourier transform infrared spectra (FT-IR) were recorded on a Nicolet Avatar-360 Fourier transform infrared spectrophotometer using a potassium bromide pellet. X-ray photoelectron spectroscopy (XPS) was conducted on a PHI-5000 VersaProbe spectrometer under  $10^{-7}$  Pa using a monochromatic Al K $\alpha$  X-ray source operating at 100 W. Raman spectra were performed on a Renishaw inVia Reflex micro-Raman spectrometer using a 100-fold objective lens and crystal laser excitation at 514.5 nm with a power of 0.1 mW. Atomic force microscopy (AFM) images were acquired under ambient conditions on a Veeco instrument Nanoscope IIIa Multimode apparatus operating in a non-contact mode with a silicon tip and cantilever operating at a frequency of 325 kHz and a scanning speed of 1 Hz. Samples were prepared by placing a drop of their dilute aqueous dispersion on a fresh mica substrate and dried in a vacuum oven at room temperature. Field-emission scanning electron microscope (FESEM) was performed on a Hitachi S-4800 operating at 3 kV. Transmission electron microscopy (TEM) and energy dispersive X-ray spectrometry (EDS) were performed on a FEI Tecnai G2 F20 S-TWIN electron

microscope operating at an accelerating voltage of 200 kV. Samples were prepared by placing a drop of their dilute chloroform dispersion on a holey-carbon-coated copper grid and dried in a vacuum oven overnight at room temperature. All the electrochemical tests were performed on a CHI660e electrochemical workstation at room temperature.

### **3. Synthesis of rGO materials**

80 mL GO solution ( $0.5 \text{ mg mL}^{-1}$ ) was transferred into a 100 mL Teflon-lined stainless steel autoclave and heated at  $140 \text{ }^{\circ}\text{C}$  for 24 h, and then naturally cooled to room temperature. During post-processing, the reaction mixtures were filtered over a  $0.22 \text{ }\mu\text{m}$  PTFE membrane, and the filter cakes were thoroughly washed by ethanol ( $500 \text{ mL} \times 3$ ), N,N-dimethylformamide ( $500 \text{ mL} \times 3$ ) and deionized water ( $500 \text{ mL} \times 3$ ), respectively, for removing any impurities. After being dried in a vacuum oven at  $80 \text{ }^{\circ}\text{C}$  for 24h, the products were afforded.

### **4. Synthesis of rGO-AHQDME heterojunction materials**

The rGO-AHQDME composite was obtained by a simple one-step hydrothermal method. The rGO-AHQDME composite was obtained by a simple one-step hydrothermal method. In detail, 80 mL GO solution ( $0.5 \text{ mg mL}^{-1}$ ) was firstly mixed with AHQDME ( $W_{\text{GO}}: W_{\text{AHQDME}} = 1:1$ ) and stirred for 1 h at room temperature. And then, the mixture suffered from a sonication treatment for 0.5 h (40 KHz, 700W), affording homogeneous GO-AHQDME hybrid solutions. Then, the brown solution was transferred into a 100 mL Teflon-lined stainless steel autoclave and heated at  $140 \text{ }^{\circ}\text{C}$  for 24 h, and then naturally cooled to room temperature. During post-processing, the reaction mixtures were filtered over a  $0.22 \text{ }\mu\text{m}$  PTFE membrane, and the filter cakes were thoroughly washed by ethanol ( $500 \text{ mL} \times 3$ ), N,N-dimethylformamide ( $500$

mL  $\times$  3) and deionized water (500 mL  $\times$  3), respectively, for removing any impurities.

After being dried in a vacuum oven at 80 °C for 24h, the products were afforded.

### **Calculation details for the functionalization degree of rGO-AHQDME sample using EA data:**

It is widely accepted that EA provides much more real and accurate element content in comparison with other analysis methods, such energy dispersive spectrometer, X-ray photoelectron spectroscopy, etc.

It is detected that the sample contains C element of 67.60% and H of 3.70%, N of 5.70% and O of 23.00%, respectively. Because pure reduced graphene oxide does not contain N element, N element in the sample only stems from amino groups in functionalized graphene in the case that amino-hydroquinone-dimethylether (AHQDME) residues are thoroughly washed away. In this end, the N mass/molar amounts are 5.7g/0.4 mol for 100 g sample according to N content of 5.70%; the loading mass/molar amounts of AHQDME functionalities are 62.4g/0.4 mol.

Furthermore, according to the molecular formulas AHQDME, it can be readily calculated the C mass/molar amounts are 38.4 g/3.2 mol of AHQDME functionalities. By easy subtracting, the C mass/molar contributed from graphene scaffolds are 29.2 g/2.4 mol. The functionalization degrees (per 100 mol carbon atom of graphene containing x mol functional species) for rGO-AHQDME are 17.

## **Electrochemical Measurements**

### **1. Work electrode fabrication:**

To a 10 mL vial, 0.0244 g sample as active materials, 0.0486 g 10 wt% PVDF/NMP (PVDF: polyvinylidene fluoride; NMP: N-methyl pyrrolidone) solution as binders, 0.0032 g Super-P powders as the conducting agents and ~3 mL ethanol solvent were added, respectively. Thereafter, the mixtures were stopped stirring until the system appeared sticky paste. And then the pasty slurries were uniformly coated on  $1 \times 1 \text{ cm}^2$  carbon clothes as the flexible current collectors using a Chinese brush pen. Subsequently, the as-prepared electrodes were dried overnight under vacuo at  $80 \text{ }^\circ\text{C}$ . The active materials in one single electrode were finely tuned to be around 1~2 mg and accurately weighed for the following capacitance calculations.

## **2. Measurement and calculation methods:**

All the electrochemical tests were performed on a CHI660e electrochemical workstation at room temperature.

### **In a three-electrode system:**

#### **In aqueous electrolyte:**

1.0 M aqueous  $\text{H}_2\text{SO}_4$  solution was used as an electrolyte, a platinum foil ( $2 \times 1 \text{ cm}^2$ ) and an Ag/AgCl saturated by KCl solution were used as the counter and reference electrodes, respectively. The electrochemical capacitive performances of the rGO-AHQDME samples were evaluated by cyclic voltammetry (CV), galvanometric charge/discharge curves (GCD), and electrochemical impedance spectroscopy (EIS) over a frequency range of 0.01 Hz to 100 kHz. CVs were carried out in a potential range of -0.2~ 0.8 V (v.s. Ag/AgCl) at varied scan rates from 20 to 200  $\text{mV s}^{-1}$ . GCDs were carried out in a potential range of -0.2~ 0.8 V (v.s. Ag/AgCl) at varied current densities from 1.0 to 20.0  $\text{A g}^{-1}$ .

#### **In organic electrolyte:**

1.0 M EMIMBF<sub>4</sub>/AN solution was used as an electrolyte, a platinum foil ( $2 \times 1$

cm<sup>2</sup>) and an Ag/AgCl saturated by KCl solution were used as the counter and reference electrodes, respectively. The electrochemical capacitive performances of the rGO-AHQDME samples were evaluated by cyclic voltammetry (CV), galvanometric charge/discharge curves (GCD), and electrochemical impedance spectroscopy (EIS) over a frequency range of 0.01 Hz to 100 kHz. CVs were carried out in a potential range of -1.6~ 0.8 V (v.s. Ag/AgCl) at varied scan rates from 10 to 100 mV s<sup>-1</sup>. GCDs were carried out in a potential range of -1.6~ 0.8 V (v.s. Ag/AgCl) at varied current densities from 2.0 to 5.0 A g<sup>-1</sup>.

#### **Calculations of capacitive characteristics:**

The gravimetric specific capacitance ( $C_s$ ) derived from galvanostatic discharge curves was calculated based on the following equation:

$$C_s = I \times \Delta t / (m \times \Delta V)$$

Where I (A) was the constant discharge current,  $\Delta t$  (s) was the discharging time, m (g) was the mass of the active materials and  $\Delta V$  (V) represented voltage drop during the discharging process.

#### **In a symmetric two-electrode cell setup:**

The pasty slurries were uniformly coated on round carbon paper with a diameter of 16 mm as the electrode. Subsequently, the as-prepared electrodes were dried overnight under vacuum at 80 °C. The total mass ( $M_t$ ) of the electrode material was calculated by subtraction method. All specific capacitance were calculated based on the neat mass of the active material in the electrode material, which was calculated by  $0.75 \times M_t$ . Before assembling two-electrode cell, the electrolyte solution was prepared using a mixture of acetonitrile (AN) and EMIMBF<sub>4</sub> (1:1, mass ratio). Nylon (PA) membrane was used as an electron separator. The assembly process was carried out in an argon-filled glovebox (LABmaster).

The gravimetric specific capacitance ( $C_s$ ) of the electrode material in the whole device was calculated from the galvanometric discharge curve based on the following formulas:

$$C_s = 4 \frac{I \cdot \Delta t}{m \cdot \Delta V}$$

where  $I$  (A) is the constant discharge current,  $\Delta t$  is the discharging time,  $m$  is the total mass of the active material in both electrodes for two-electrode cells,  $\Delta V$  represents the potential window. The gravimetric and volumetric energy densities ( $E_w$ ) in two-electrode device were calculated using the following formulas:

$$E_w = 0.125 C_s \times (\Delta V)^2 / 3.6$$

Where  $C_s$  ( $F g^{-1}$ ) was the specific capacitance of the electrode material in the whole device,  $\Delta V$  (V) represented voltage drop during the discharging process.

The gravimetric power densities ( $P_w$ ) were calculated using the following formulas:

$$P_w = 3600 \frac{E_w}{\Delta t}$$

Where  $E_w$  (Wh  $kg^{-1}$ ) was the energy density of the whole device,  $\Delta t$  (s) was the discharging time.

#### **Electrical conductivity tests and calculations:**

The sheet resistances of rGO-AHQDME sample was measured on a 280SI four-point probe system (Four Dimensions Inc., USA). The sheet resistance ( $R_s$ ) data for the sample was obtained by averaging three sheet resistance values collected from different testing positions. The membrane/film thicknesses ( $h$ ) of the corresponding samples were tested by a CHY-U Sumspring gauge. The electrical conductivity ( $\sigma$ ) of membrane/film samples can be derived from the formula:

$$\delta = 1/(R_s \times h)$$

The parameters of rGO-AHQDME films were listed in **Table S1** as following: **Table S1**. The measured parameters of sheet resistance ( $R_s$ ) and thickness ( $h$ ), and the calculated electrical conductivity ( $\sigma$ ) for rGO-AHQDME films.

**Table S1. The measured parameters of sheet resistance ( $R_s$ ) and thickness ( $h$ ), and the calculated electrical conductivity ( $\sigma$ ) for rGO-AHQDME heterojunction films.**

| Product    | FD | Samples | $R_s$<br>( $\Omega/\square$ ) | $h$<br>(nm) | $\sigma$<br>(S/cm) | Average $\sigma$<br>(S/cm) |
|------------|----|---------|-------------------------------|-------------|--------------------|----------------------------|
| rGO-AHQDME | 17 | Sample1 | 12165                         | 127         | 6.5                | 6.5                        |
|            |    | Sample2 | 11898                         | 130         | 6.5                |                            |
|            |    | Sample3 | 11746                         | 132         | 6.4                |                            |

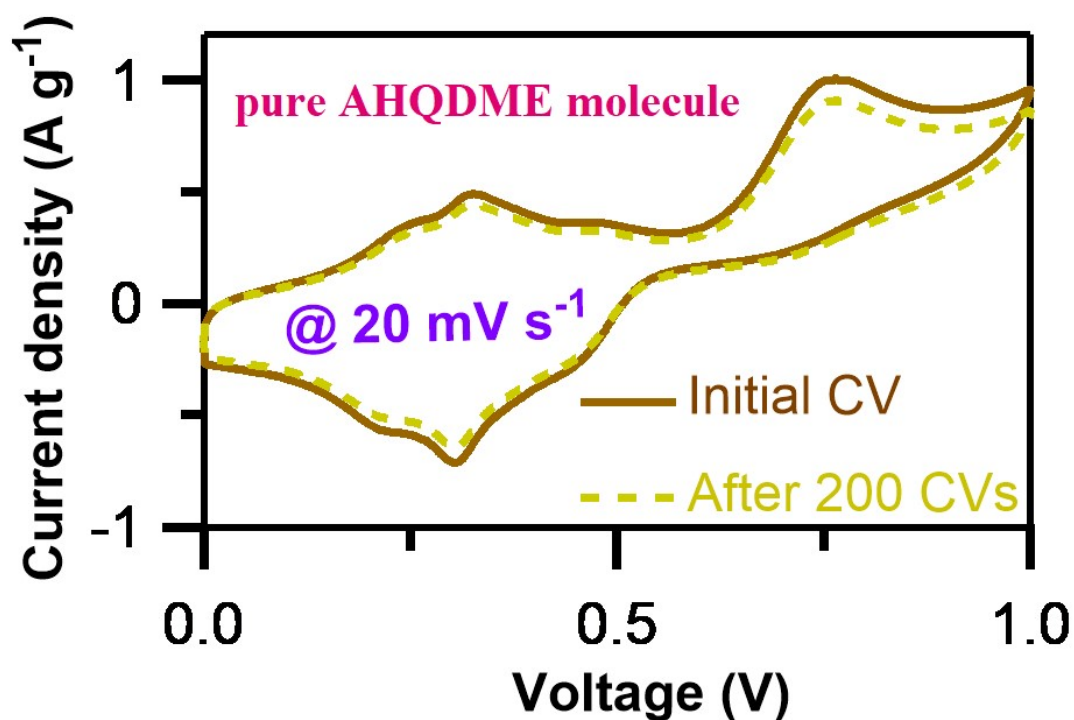

**Fig. S1.** CV curves of AHQDME in aqueous  $H_2SO_4$  electrolyte in prototype



three-electrode cell.

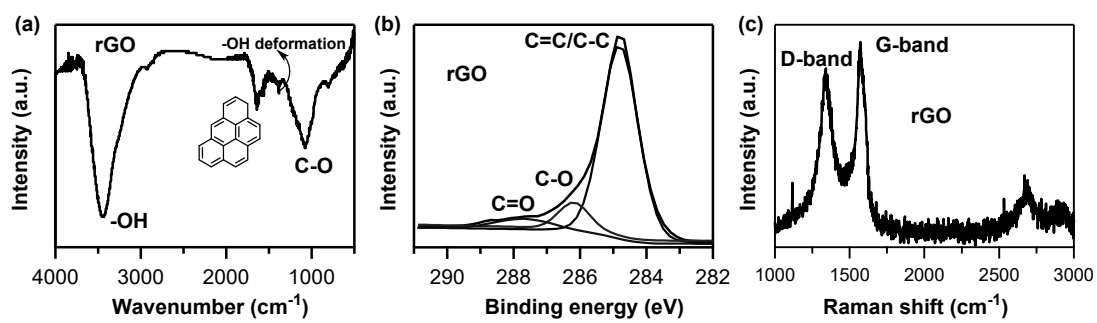

**Fig. S2.** (a) FT-IR, (b) C1s XPS, (c) Raman spectra of reduced graphene oxide (rGO).

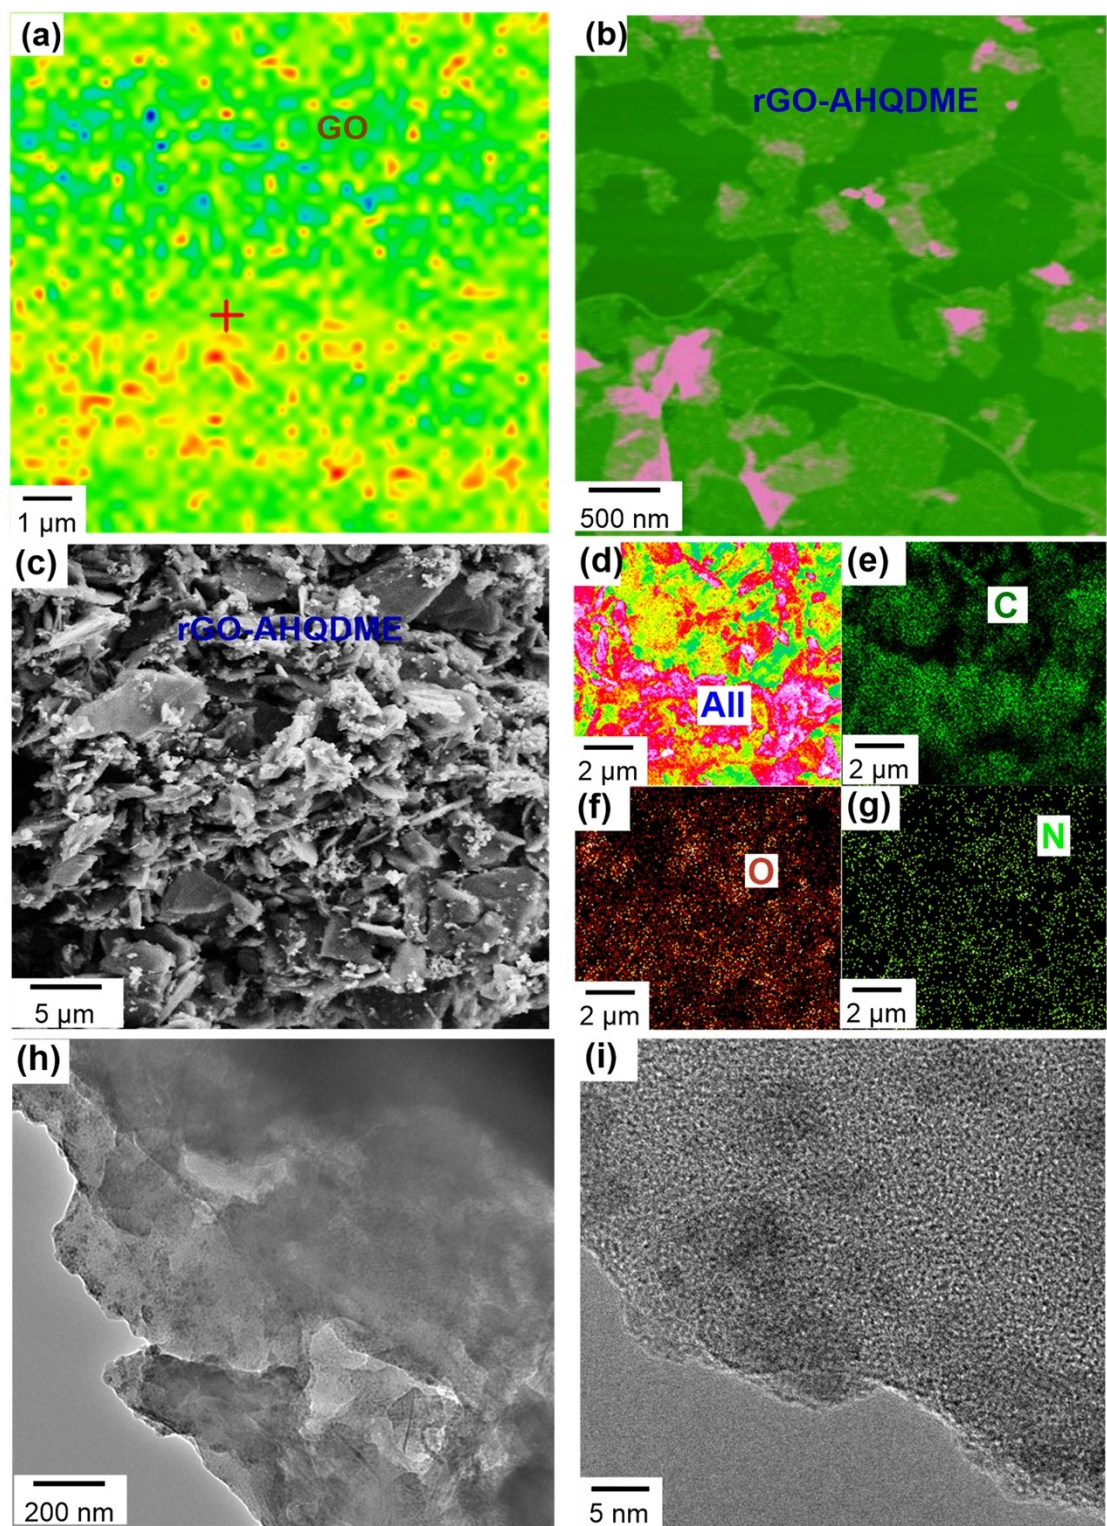

**Fig. S3.** (a) Raman mapping images of GO. (b) AFM images and (c) FESEM spectra of rGO-AHQDME. (d–g) EDS mappings of rGO-AHQDME for all elements tested, C, O, and N. (h) and (i) TEM images of rGO-AHQDME.

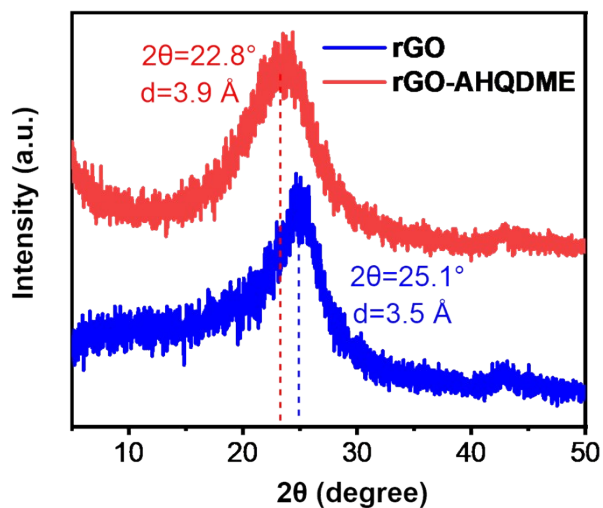

**Fig. S4.** X-ray diffraction pattern of rGO and rGO-AHQDME heterojunction material.

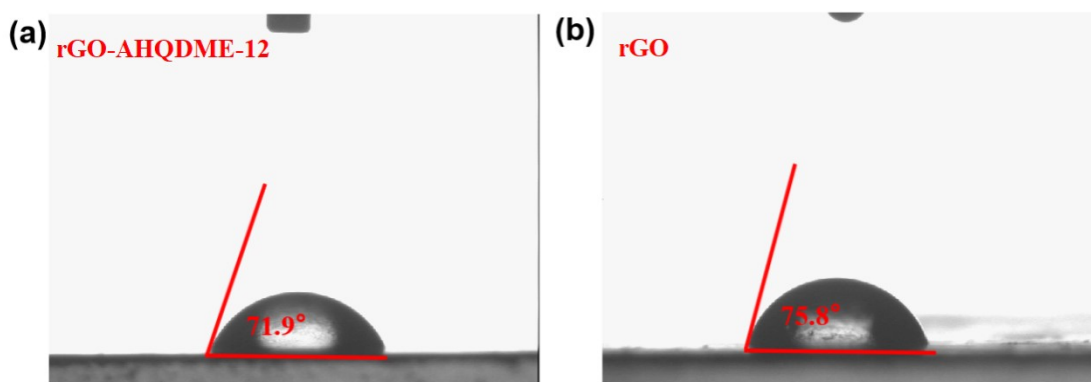

**Fig. S5.** Contact angle image of (a) rGO-AHQDME-12 (b) rGO films.

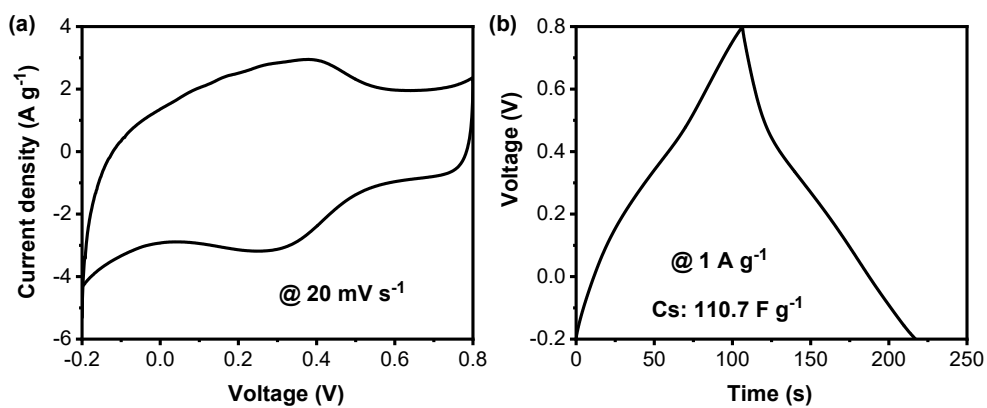

**Fig. S6.** (a) CV, (b) GCD curves of rGO electrode in aqueous three-electrode cell.

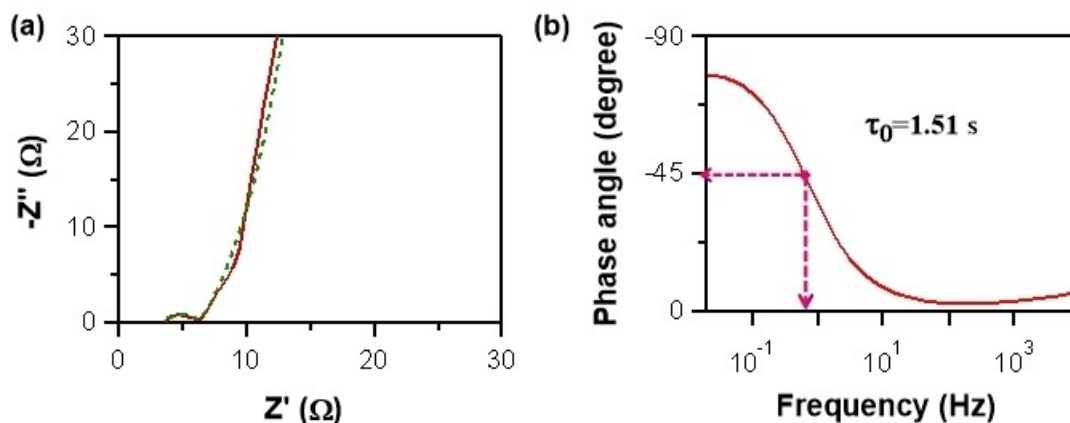

**Fig. S7.** (a) EIS-Nyquist and (b) Bode plots of rGO-AHQDME in organic electrolyte in the prototype three-electrode cell.

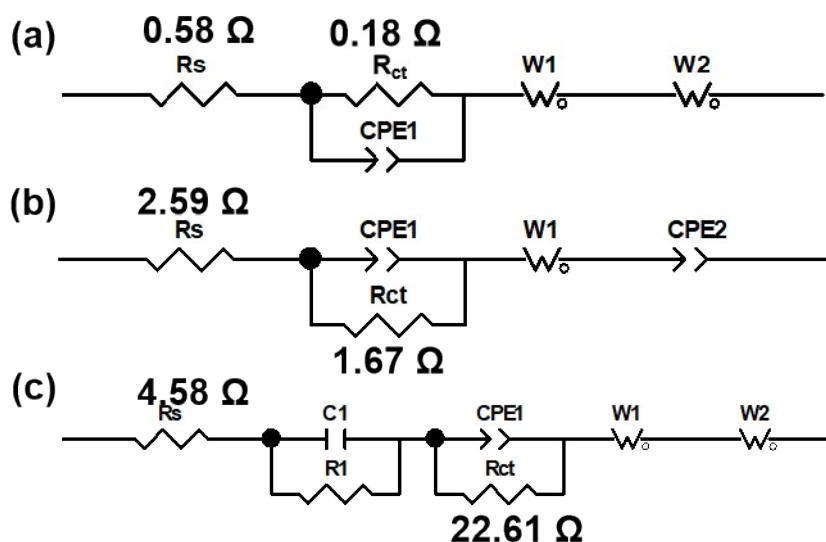

**Fig. S8.** The simulated equivalent circuit by Z-view software of (a) rGO-AHQDME in aqueous electrolyte in prototype three-electrode cell, (b) rGO-AHQDME in organic electrolyte in prototype three-electrode cell, (c) rGO-AHQDME//rGO-AHQDME in organic electrolyte with symmetric two-electrode coin device. The equivalent circuit consists of the following parts:  $R_s$ ,  $R_{ct}$ ,  $W$ ,  $Cdl$  and  $CPE$ , where  $R_{ct}$  represents the charge transfer resistance,  $R_s$  represents the bulk solution resistance,  $W$  represents the Warburg impedance of diffusive resistance,  $Cdl$  means the double-layer capacitance and  $CPE$  means the constant phase element.

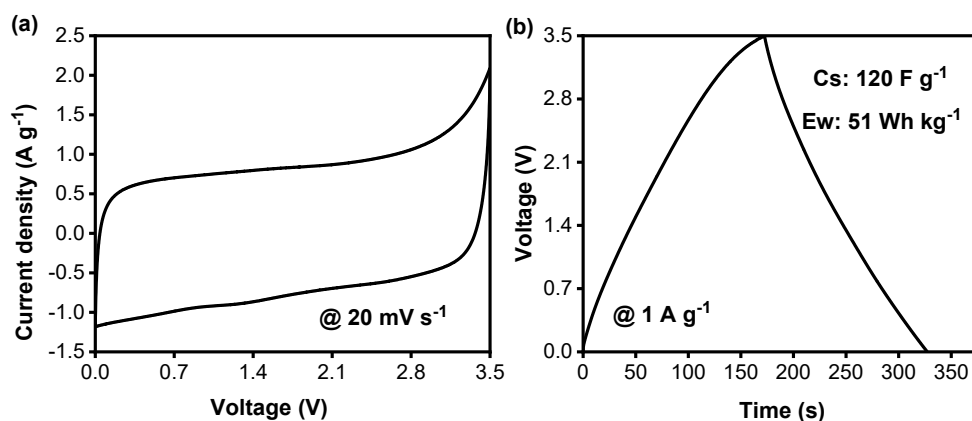

**Fig. S9.** (a) CV, (b) GCD curves of rGO//rGO symmetrical two-electrode cell.

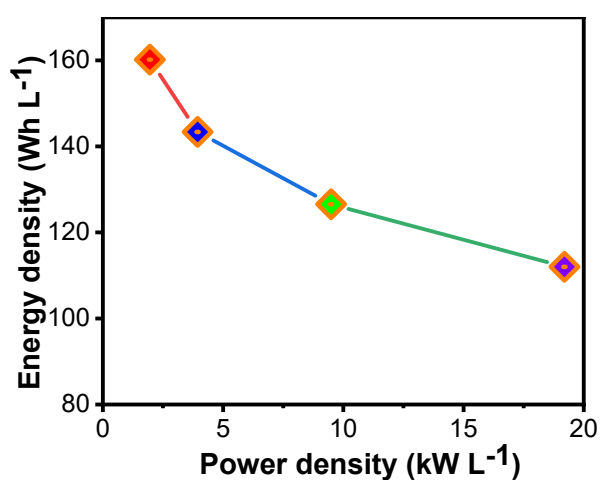

**Fig. S10.** Ragone plot in volumetric metric.

**Table S2.** Comparisons of energy-storage performances of the prepared rGO-AHQDME//rGO-AHQDME symmetric two-electrode coin in this work with other recently reported materials.

| Electrode materials       | Electrolytes (Voltage/V)                   | C <sub>s</sub> (F g <sup>-1</sup> ) | E <sub>w</sub> (Wh kg <sup>-1</sup> ) | Capacitance retention/cycling times |
|---------------------------|--------------------------------------------|-------------------------------------|---------------------------------------|-------------------------------------|
| This work                 | EMIMBF <sub>4</sub> /AN (3.5 V)            | 338                                 | 143                                   | 91%/10000                           |
| MWNTs <sup>1</sup>        | LiClO <sub>4</sub> /AND-AN-DMC (2 V)       | 136.6                               | 71.1                                  | 84%/10000                           |
| NAC950 <sup>2</sup>       | SBPBF <sub>4</sub> /PC (2.7V)              | 134                                 | 35.7                                  | 84.3%/10000                         |
| AC/MXene-2:1 <sup>3</sup> | Et <sub>4</sub> NBF <sub>4</sub> /AN (2 V) | 126                                 | 17.5                                  | 92.4%/100000                        |
| Zn-BHS <sup>4</sup>       | DMF/Zn-TFMS (1.8 V)                        | 112                                 | 58.1                                  | 84%/5000                            |

|                        |                                                                 |      |       |               |
|------------------------|-----------------------------------------------------------------|------|-------|---------------|
| FCNS <sup>5</sup>      | IL-AN/Zn(CF <sub>3</sub> SO <sub>3</sub> ) <sub>2</sub> (1.8 V) | 226  | 10.86 | 97.8%/ 60 000 |
| Zn-CMP-S <sup>6</sup>  | AN/ TEA BF <sub>4</sub> (2.7 V)                                 | 136  | 34    | 82%%/10000    |
| GNPC-0.75 <sup>7</sup> | PC/EMIMBF <sub>4</sub> -TEABF <sub>4</sub> (3 V)                | 397  | 124.1 | 98 %/60000    |
| ACF <sup>8</sup>       | AN/ TEABF <sub>4</sub><br>(2.7 V)                               | 112  | 29.50 | 87 %/10000    |
| CP-Cr <sup>9</sup>     | DMSO /TEABF <sub>4</sub> (3 V)                                  | 48.7 | 60.8  | 77 %/5000     |
| SHS@SC <sup>10</sup>   | PC/TEABF <sub>4</sub><br>(1.6 V)                                | 29.6 | 9.67  | 90.9 %/3000   |

---

## References

- 1 C. Song, J. Yun, H. Lee, H. Park, Y. R. Jeong, G. Lee, M. S. Kim and J. S. Ha, *Adv. Funct. Mater.*, 2019, **29**, 1901996.
- 2 Z.-F. Wang, Z. Yi, S.-C. Yu, Y.-F. Fan, J. Li, L. Xie, S.-C. Zhang, F. Su and C.-M. Chen, *ACS Appl. Mater. Interfaces*, 2022, **14**, 24497-24508.
- 3 L. Yu, L. Hu, B. Anasori, Y.-T. Liu, Q. Zhu, P. Zhang, Y. Gogotsi and B. Xu, *ACS Energy Lett.*, 2018, **3**, 1597-1603.
- 4 X. Qiu, N. Wang, Z. Wang, F. Wang and Y. Wang, *Angew. Chem. Int. Ed.*, 2021, **60**, 9610-9617.
- 5 H. Zhou, C. Liu, J.-C. Wu, M. Liu, D. Zhang, H. Song, X. Zhang, H. Gao, J. Yang and D. Chen, *J. Mater. Chem. A*, 2019, **7**, 9708-9715.
- 6 N. Talreja, S. Jung, L. T. H. Yen and T. Kim, *Chem. Eng. J.*, 2020, **379**, 122332.
- 7 X. Shi, S. Zhang, X. Chen, T. Tang and E. Mijowska, *Carbon*, 2020, **157**, 55-63.
- 8 M. Vijayakumar, R. Santhosh, J. Adduru, T. N. Rao and M. Karthik, *Carbon*, 2018, **140**, 465-476.
- 9 S. Acharya, S. Sahoo, S. Sonal, J. H. Lee, B. K. Mishra and G. C. Nayak, *Composites, Part B*, 2020, **193**, 107913.
- 10 J. Shang, Q. Huang, L. Wang, Y. Yang, P. Li and Z. Zheng, *Adv. Mater.*, 2020, **32**, 1907088.
